# Supplementary material for: Effect of Glycerol, Calcium and Transglutaminase Post-Treatment on the Properties of Regenerated Fibers from Rennet-Treated Casein Micelles
Source: MDPI journal article supplement (doi:10.3390/colloids6020017), 2022-03-22
Supplement: s1 [file s1]

Archive with 1 entries (1 files):
- colloids-1587768-supplementary.pdf
